# Supplementary material
Source: HighWire-hosted journal article supplement (https://jnm.snmjournals.org/highwire/filestream/100066/field_highwire_adjunct_files/0/248633_Supplemental_Data.pdf)
Supplement: 248633_Supplemental_Data.pdf [file 248633_Supplemental_Data.pdf]

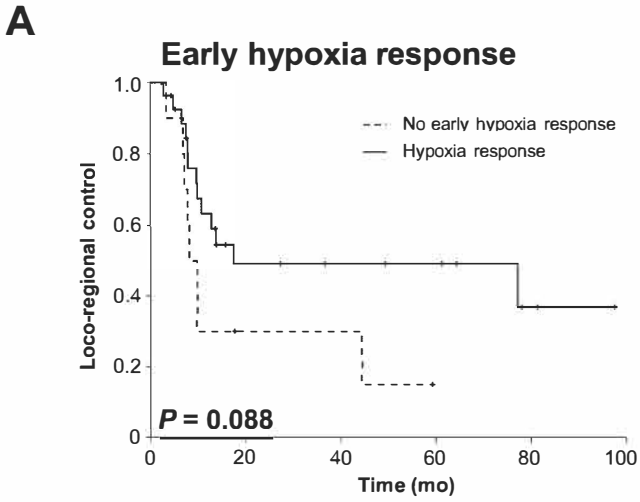

|                     |    |   |   |   |   |   |
|---------------------|----|---|---|---|---|---|
| No hypoxia response | 10 | 2 | 2 | 0 | 0 | 0 |
| Hypoxia response    | 28 | 9 | 7 | 6 | 2 | 0 |

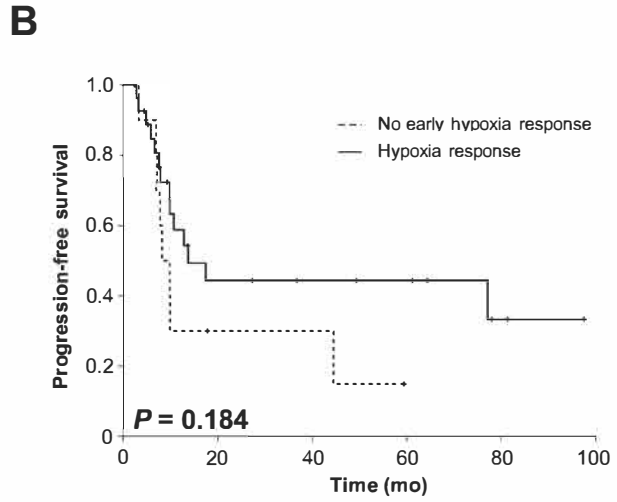

|                     |    |   |   |   |   |   |
|---------------------|----|---|---|---|---|---|
| No hypoxia response | 10 | 2 | 2 | 0 | 0 | 0 |
| Hypoxia response    | 28 | 9 | 7 | 6 | 2 | 0 |

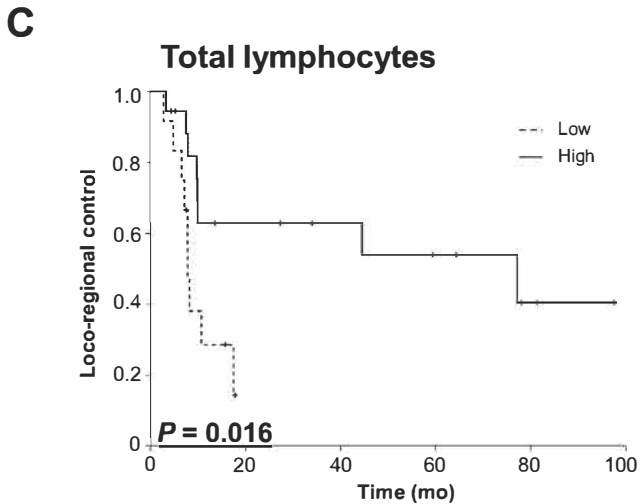

|      |    |   |   |   |   |   |
|------|----|---|---|---|---|---|
| Low  | 12 | 0 | 0 | 0 | 0 | 0 |
| High | 18 | 9 | 7 | 5 | 2 | 0 |

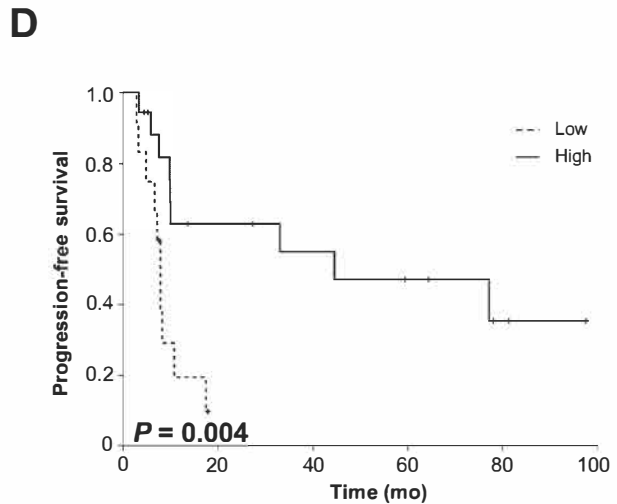

|      |    |   |   |   |   |   |
|------|----|---|---|---|---|---|
| Low  | 12 | 0 | 0 | 0 | 0 | 0 |
| High | 18 | 9 | 7 | 5 | 2 | 0 |

**Supplemental figure 1. LRC and PFS of HPV-negative HNSCC patients depending on early hypoxia response and levels of tumor-infiltrating lymphocytes.** Kaplan-Meier curves showing LRC (A) and PFS (B) depending on hypoxia response in weeks 2 of chemoradiation. LRC (C) and PFS (D) stratified by levels of tumor-infiltrating lymphocytes.

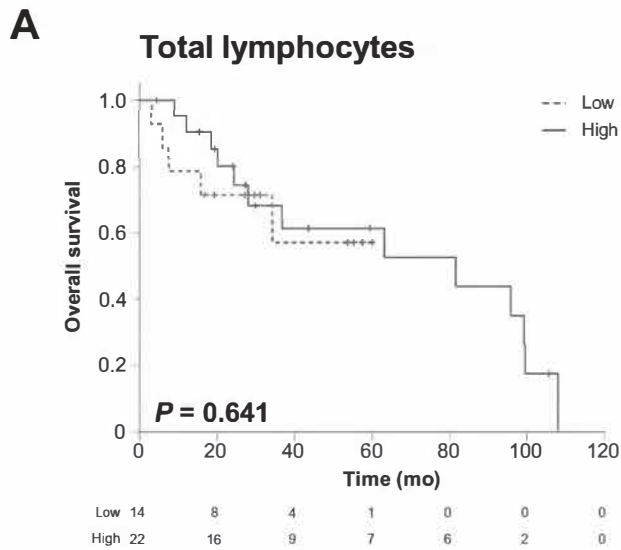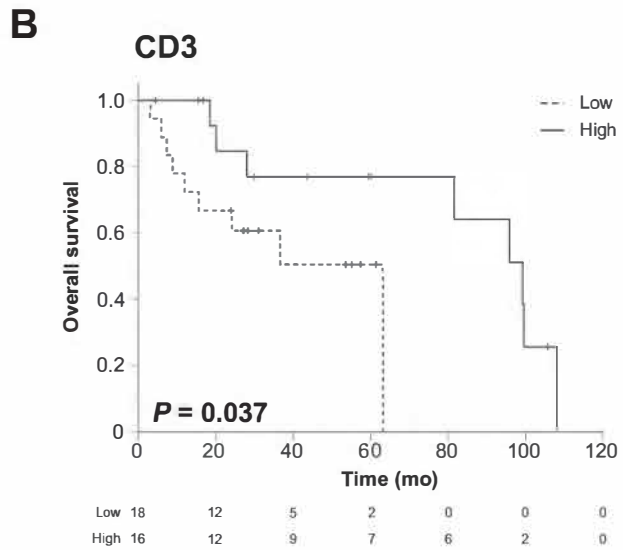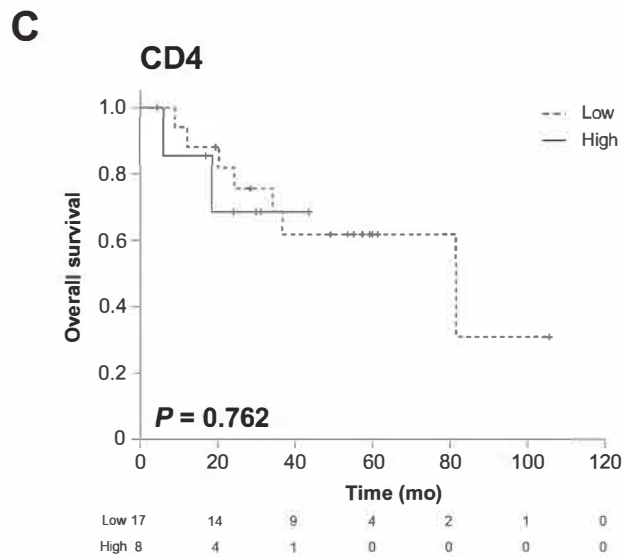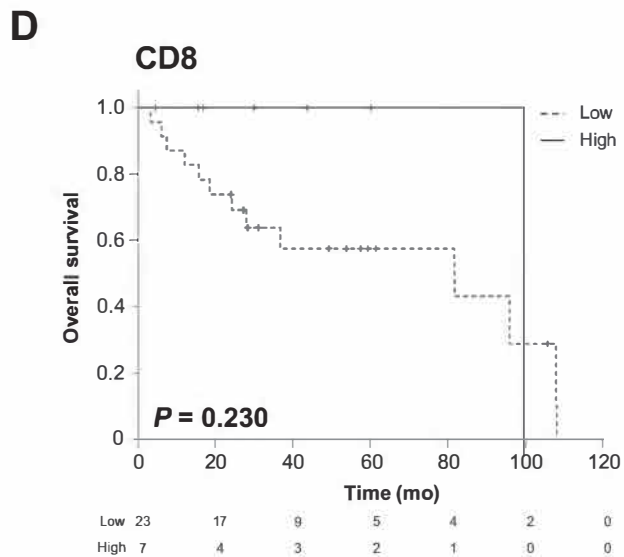

**Supplemental figure 2. OS for HNSCC patients receiving definitive chemoradiation in dependence of their levels of infiltrating lymphocytes.** Kaplan-Meier curves demonstrating OS depending on total lymphocyte (A), CD3-positive (B), CD4-positive (C) and CD8-positive lymphocyte levels in pre-therapeutic tumor biopsies. *P* values are obtained from log-rank tests testing for differences between the Kaplan-Meier curves.

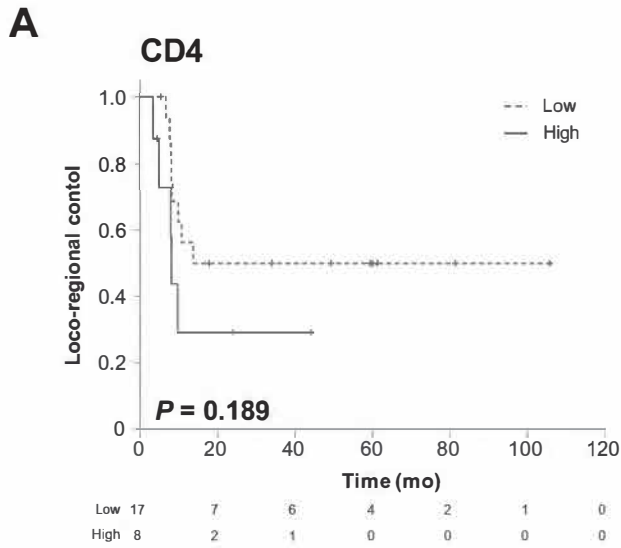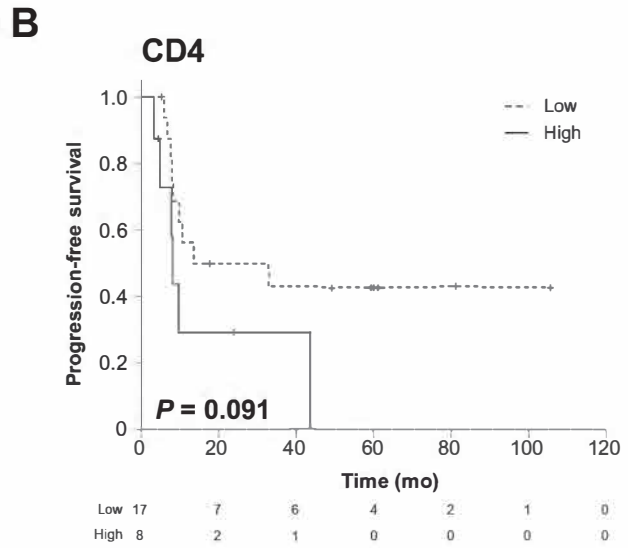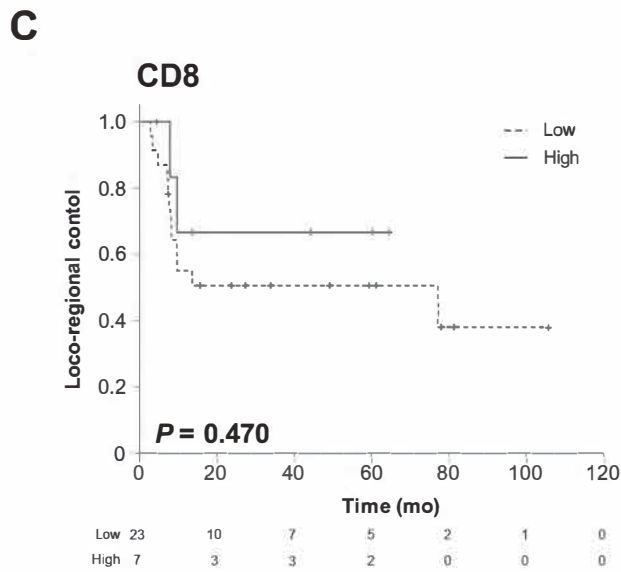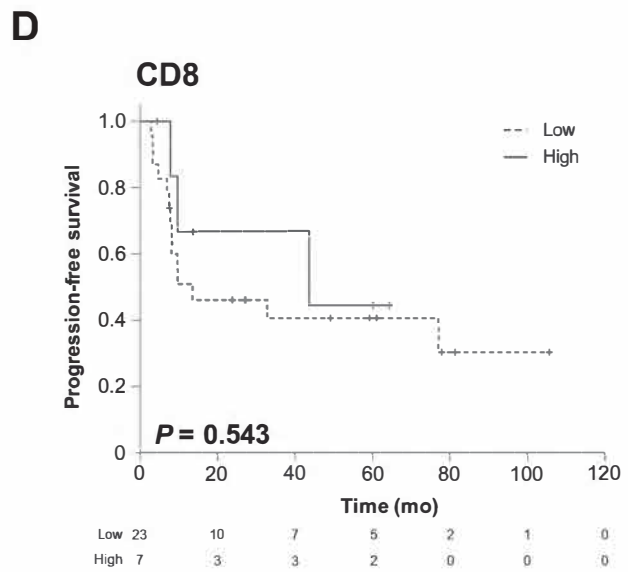

Supplemental figure 3. LRC and PFS as a function of CD4- and CD8-positive T lymphocytes. Kaplan-Meier curves demonstrating LRC and PFS depending on CD4-positive (A and B) and CD8-positive lymphocyte (C and D) levels. P values are obtained from log-rank tests testing for differences between the Kaplan-Meier curves.

**A**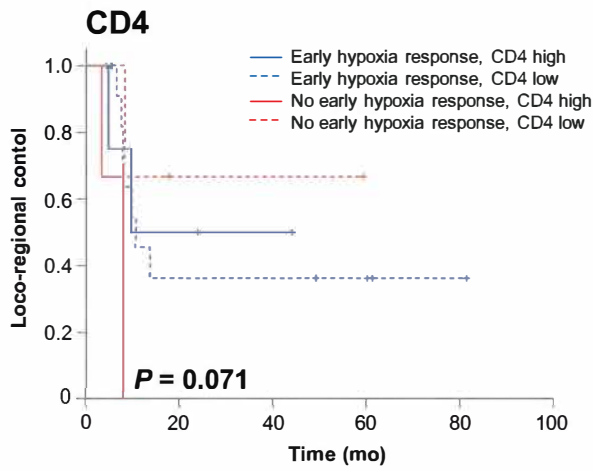**B**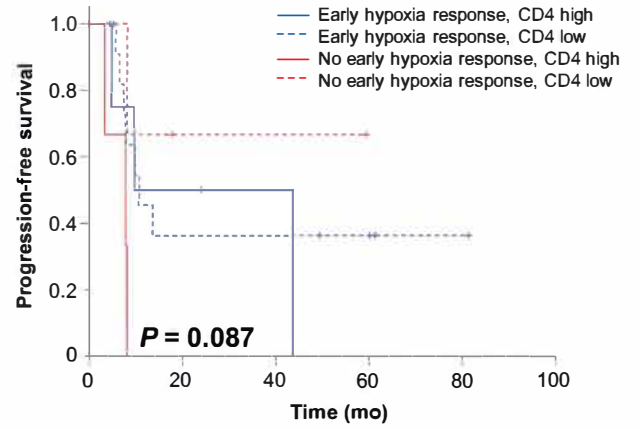

|                               |    |   |   |   |   |   |
|-------------------------------|----|---|---|---|---|---|
| Hypoxia response, CD4 high    | 5  | 2 | 1 | 0 | 0 | 0 |
| Hypoxia response, CD4 low     | 12 | 4 | 4 | 3 | 1 | 0 |
| No hypoxia response, CD4 high | 3  | 0 | 0 | 0 | 0 | 0 |
| No hypoxia response, CD4 low  | 3  | 1 | 1 | 0 | 0 | 0 |

|                               |    |   |   |   |   |   |
|-------------------------------|----|---|---|---|---|---|
| Hypoxia response, CD4 high    | 5  | 2 | 1 | 0 | 0 | 0 |
| Hypoxia response, CD4 low     | 12 | 4 | 4 | 3 | 1 | 0 |
| No hypoxia response, CD4 high | 3  | 0 | 0 | 0 | 0 | 0 |
| No hypoxia response, CD4 low  | 3  | 1 | 1 | 0 | 0 | 0 |

**C**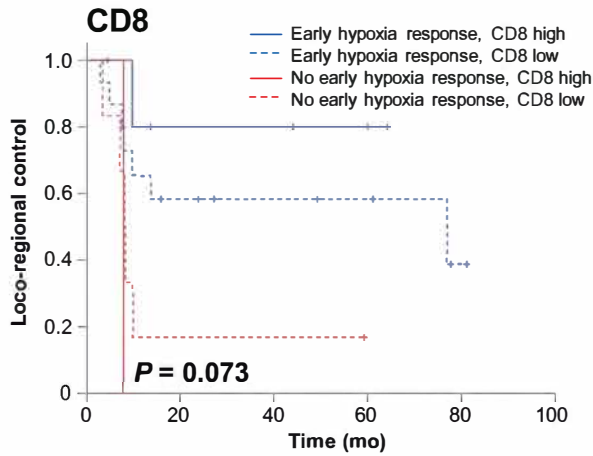**D**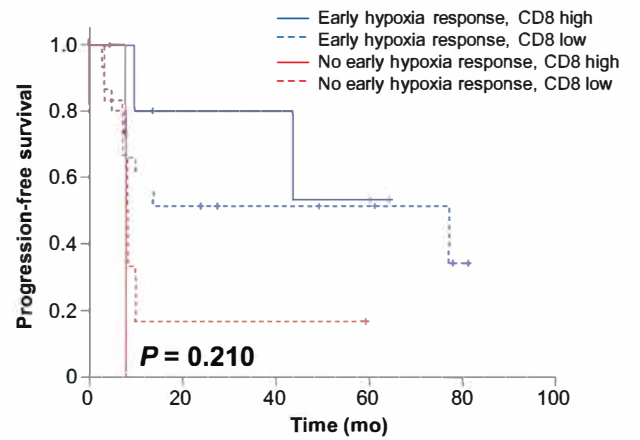

|                               |    |   |   |   |   |   |
|-------------------------------|----|---|---|---|---|---|
| Hypoxia response, CD8 high    | 6  | 3 | 3 | 2 | 0 | 0 |
| Hypoxia response, CD8 low     | 15 | 7 | 5 | 4 | 1 | 0 |
| No hypoxia response, CD8 high | 1  | 0 | 0 | 0 | 0 | 0 |
| No hypoxia response, CD8 low  | 6  | 1 | 1 | 0 | 0 | 0 |

|                               |    |   |   |   |   |   |
|-------------------------------|----|---|---|---|---|---|
| Hypoxia response, CD8 high    | 6  | 3 | 3 | 2 | 0 | 0 |
| Hypoxia response, CD8 low     | 15 | 7 | 5 | 4 | 1 | 0 |
| No hypoxia response, CD8 high | 1  | 0 | 0 | 0 | 0 | 0 |
| No hypoxia response, CD8 low  | 6  | 1 | 1 | 0 | 0 | 0 |

**Supplemental figure 4. LRC and PFS of HNSCC patients depending on early hypoxia response and levels of CD4- and CD8-positive lymphocytes. Kaplan-Meier curves showing LRC (A) and PFS (B) depending on early hypoxia resolution and CD4-positive lymphocyte levels. LRC (C) and PFS (D) stratified by early hypoxia resolution and levels of CD8-positive lymphocytes.**

Supplemental table 1: Description of antibodies used for immunohistochemical stains and corresponding antigen retrieval.

| Antigen       | Clone           | Company        | Dilution   | Antigen retrieval     |
|---------------|-----------------|----------------|------------|-----------------------|
| CD3           | 2GV6            | Roche/Ventana  | Prediluted | Citrate buffer pH 6,1 |
| CD4           | SP35            | Roche/Ventana  | Prediluted | Citrate buffer pH 9   |
| CD8           | SP57            | Roche/Ventana  | Prediluted | Tris-EDTA buffer pH 9 |
| PD-1          | NAT105          | Roche/Ventana  | Prediluted | Tris-EDTA buffer pH 9 |
| PD-L1         | SP263           | Roche/Ventana  | Prediluted | Tris-EDTA buffer pH 9 |
| CAIX          | C48E            | Cell Signaling | 1:300      | pH 6.1 citrate buffer |
| CD34          | QBEnd10 (IR632) | DAKO           | Prediluted | pH 6.1 citrate buffer |
| CD44          | 156-3C11        | Cell Signaling | 1:500      | pH 6.1 citrate buffer |
| HIF1 $\alpha$ | MAB1935         | R&D            | 1:100      | pH 6.1 citrate buffer |

Supplemental table 2: Pairwise correlations between immune and hypoxia biomarkers. Pearson correlations were conducted, and Pearson's r and p values are indicated in the table.

|             |   | HIF1 $\alpha$ * | CAIX†  | CD34             |
|-------------|---|-----------------|--------|------------------|
| Lymphocytes | r | -0.034          | 0.074  | <b>0.476</b>     |
|             | p | 0.838           | 0.656  | <b>0.003 (*)</b> |
| CD3         | r | -0.300          | 0.234  | 0.313            |
|             | p | 0.072           | 0.164  | 0.059            |
| CD4         | r | 0.028           | -0.048 | 0.181            |
|             | p | 0.870           | 0.777  | 0.284            |
| CD8         | r | -0.323          | 0.196  | 0.275            |
|             | p | 0.052           | 0.246  | 0.099            |

\*HIF1 $\alpha$ =Hypoxia-inducible factor-1 $\alpha$

†CAIX=Carbonic anhydrase IX

Supplemental table 3: Cox proportional hazards analyses of several tumor hypoxia-related parameters regarding their impact on LRC and PFS.

| Univariate                                                       | LRC          |              | PFS          |              |
|------------------------------------------------------------------|--------------|--------------|--------------|--------------|
|                                                                  | HR           | p-value      | HR           | p-value      |
| Tumor hypoxic subvolume <sub>SUV=1.4</sub> wk0 ≥3.87 mL (median) | 0.533        | 0.152        | 0.560        | 0.159        |
| Tumor hypoxic subvolume <sub>SUV=1.4</sub> wk2 ≥0.02 mL (median) | 1.502        | 0.343        | 1.391        | 0.421        |
| Tumor hypoxic subvolume <sub>SUV=1.4</sub> wk5 ≥0.00 mL (median) | 0.942        | 0.937        | 0.783        | 0.743        |
| SUV index wk0 (tumor-to-muscle) ≥1.89 (median)                   | 1.243        | 0.612        | 1.520        | 0.312        |
| SUV index wk2 (tumor-to-muscle) ≥1.51 (median)                   | 1.883        | 0.158        | 1.702        | 0.213        |
| SUV index wk5 (tumor-to-muscle) ≥1.31 (median)                   | 0.715        | 0.460        | 0.450        | 0.725        |
| SUV index wk0 (tumor-to-muscle) ≥1.4                             | 0.849        | 0.791        | 1.058        | 0.927        |
| SUV index wk0 (tumor-to-muscle) ≥1.6                             | 0.950        | 0.914        | 1.169        | 0.738        |
| <b>SUV index wk2 (tumor-to-muscle) ≥1.4</b>                      | <b>3.189</b> | <b>0.041</b> | <b>3.661</b> | <b>0.021</b> |
| SUV index wk2 (tumor-to-muscle) ≥1.6                             | 1.580        | 0.296        | 1.463        | 0.363        |
| SUV index wk5 (tumor-to-muscle) ≥1.4                             | 0.904        | 0.839        | 0.752        | 0.553        |
| SUV index wk5 (tumor-to-muscle) ≥1.6                             | 1.902        | 0.311        | 1.685        | 0.409        |
| <b>ΔSUV index (tumor-to-muscle) wk0-2 ≥0</b>                     | <b>3.111</b> | <b>0.011</b> | <b>2.487</b> | <b>0.035</b> |
| ΔSUV index (tumor-to-muscle) wk0-5 ≥0                            | 1.126        | 0.793        | 0.863        | 0.731        |
| ΔSUV index (tumor-to-muscle) wk2-5 ≥0                            | 0.283        | 0.092        | 0.242        | 0.057        |
